# Supplementary material for: Length-dependent processing of telomeres in the absence of telomerase
Source: PubMed Central journal article supplement — Nucleic Acids Res. 2014 Jan 6;42(6):3648–65. doi: 10.1093/nar/gkt1328 (PMC3973311; doi:10.1093/nar/gkt1328), 2014-01-06
Supplement: supp_gkt1328_nar-02857-d-2013-File010.pdf [file supp_gkt1328_nar-02857-d-2013-File010.pdf]

SUPPLEMENTARY INFORMATION

Fallet et al., Figure Supp 1

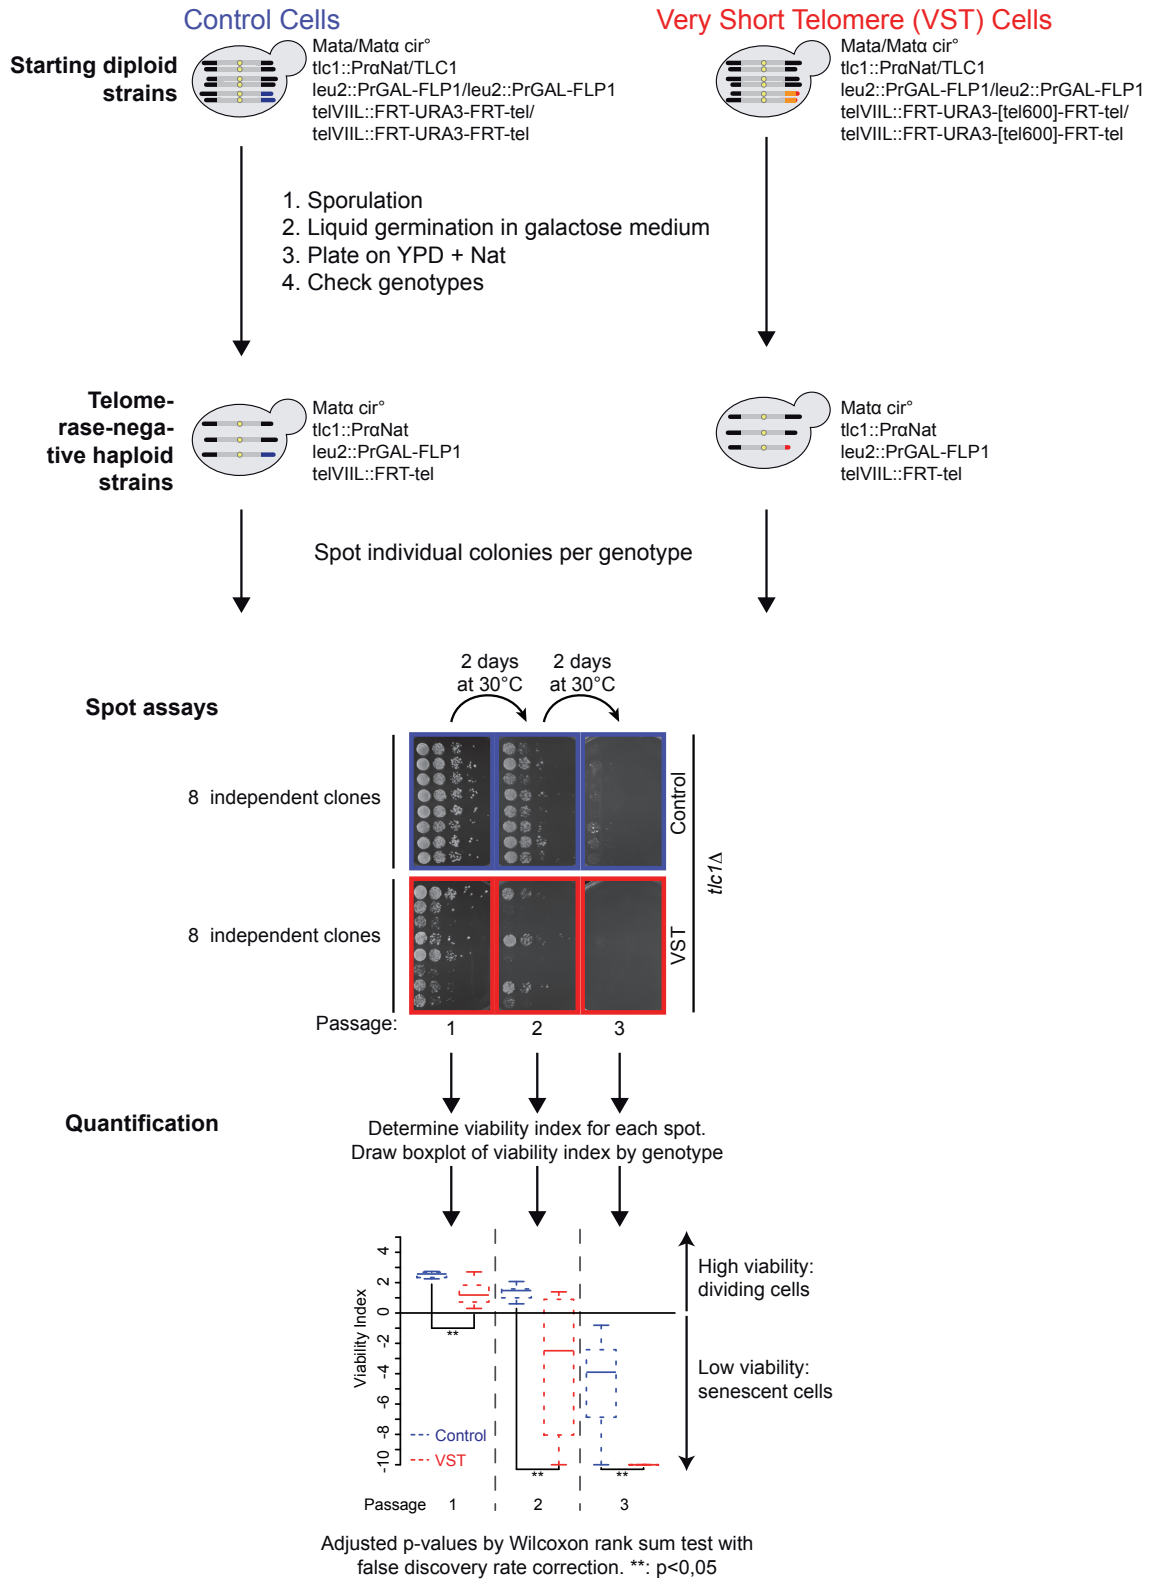

*Supplementary Figure 1: Experimental setup for the study of one single very short telomere in senescence.*

In starting diploid strains, one copy of the telomerase template RNA gene *TLC1* was replaced by a gene encoding resistance to Nourseothricin under the control of a haploid-specific promoter (*PraNat*; (1,2)). These starting diploids also contained at the homozygous state the artificial construct detailed in Figure 1B (either the Control or VST construct) replacing the last 15 kb of both VIIL arms. *FLP1*, encoding the site-specific recombinase, was placed under the control of a promoter inducible by galactose. *cir*<sup>o</sup> indicates that these strains were deprived of the 2micron to avoid toxicity upon the induction of *Flp1* (3). Additional mutations in DNA-processing genes were introduced at the heterozygous state in these diploids using the selectable markers *His3MX6*, *TRP1*, or *KanMX6* (4). These diploids were sporulated, germinated for 6–9 h in galactose-containing liquid media to induce the excision of the region between the two FRT sites (Figure 1B), plated in Nourseothricin-containing media to select for *tlc1Δ* spores and allowed to form colonies for 40 h. Many of these independent telomerase-negative haploid spore colonies were genotyped by streaking part of the colonies on selective media lacking uracil (to check for *URA3* excision) and histidine or tryptophan or containing G418 (to check for deletion of additional mutations in DNA repair pathways). For each experiment, *tlc1Δ ura3* independent colonies containing additional mutations or not were followed by serial spot assays. For each genotype, 8 to 16 independent colonies were studied. A viability index could be determined for each sample at each passage by quantification of digitalized images of the spots. Viability indexes are plotted by genotype for each passage. Adjusted p values were obtained by Wilcoxon rank-sum test with a false discovery rate correction. \*: p < 0.1; \*\*: p < 0.05. See Supplementary Table 2 for detailed p values. Each full experiment was repeated at least twice with independent diploid starting strains and similar results were obtained.

**A**

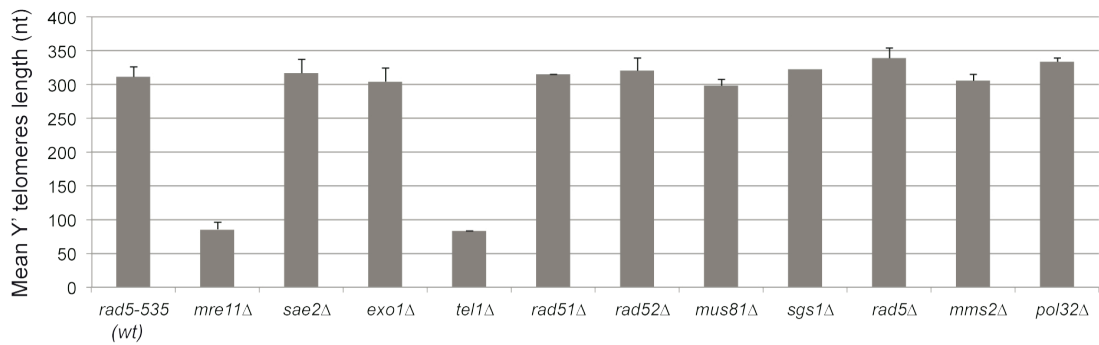

**B**

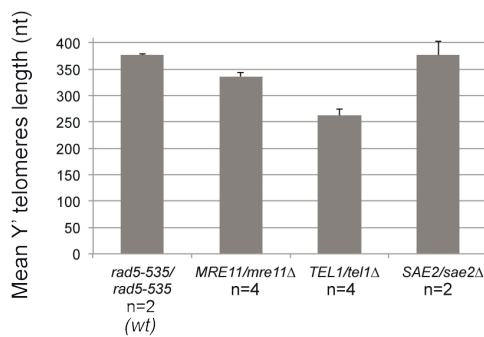

**C**

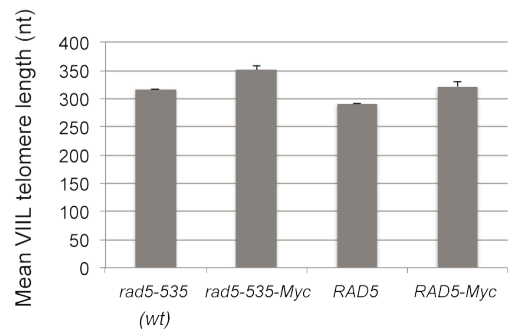

**Supplementary Figure 2: Telomere length of various strains used in this study**

**(A)** Mean length of Y' telomeres +/- s.d. in TLC1 haploids with the indicated genotypes were determined by telomere-PCR (5). n=2 except for sgs1Δ (n=1) and rad5Δ (n=3). **(B)** Mean length of Y' telomeres +/- s.d. in TLC1/tlc1Δ diploids with the indicated genotypes obtained as in (A). **(C)** Mean length of the VII-L telomere +/- s.d. in TLC1 haploids with the indicated genotypes were determined by telomere-PCR. n=2

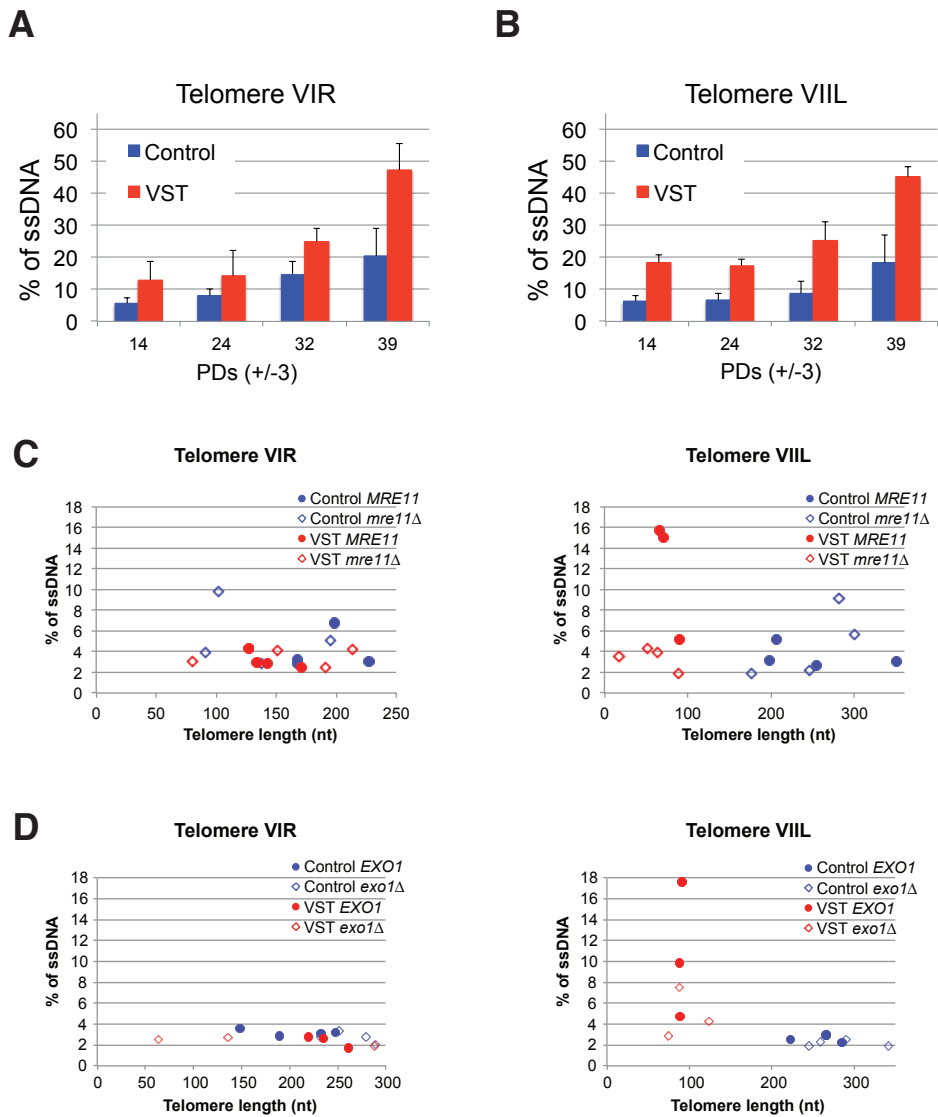

Supplementary Figure 3: The accumulation of subtelomeric ssDNA contributes to senescence.

(A–B) The results of ssDNA quantification in Figure 2A represented as histograms. Error bars indicate s.e.m. from 3 independent experiments. (A) Telomere VIR. (B) Telomere VIII. (C) The results of ssDNA quantification for *MRE11/mre11Δ* in Figure 2C represented as a function of telomere length. (D) The results of ssDNA quantification for *EXO1/exo1Δ* in Figure 2D represented as a function of telomere length.

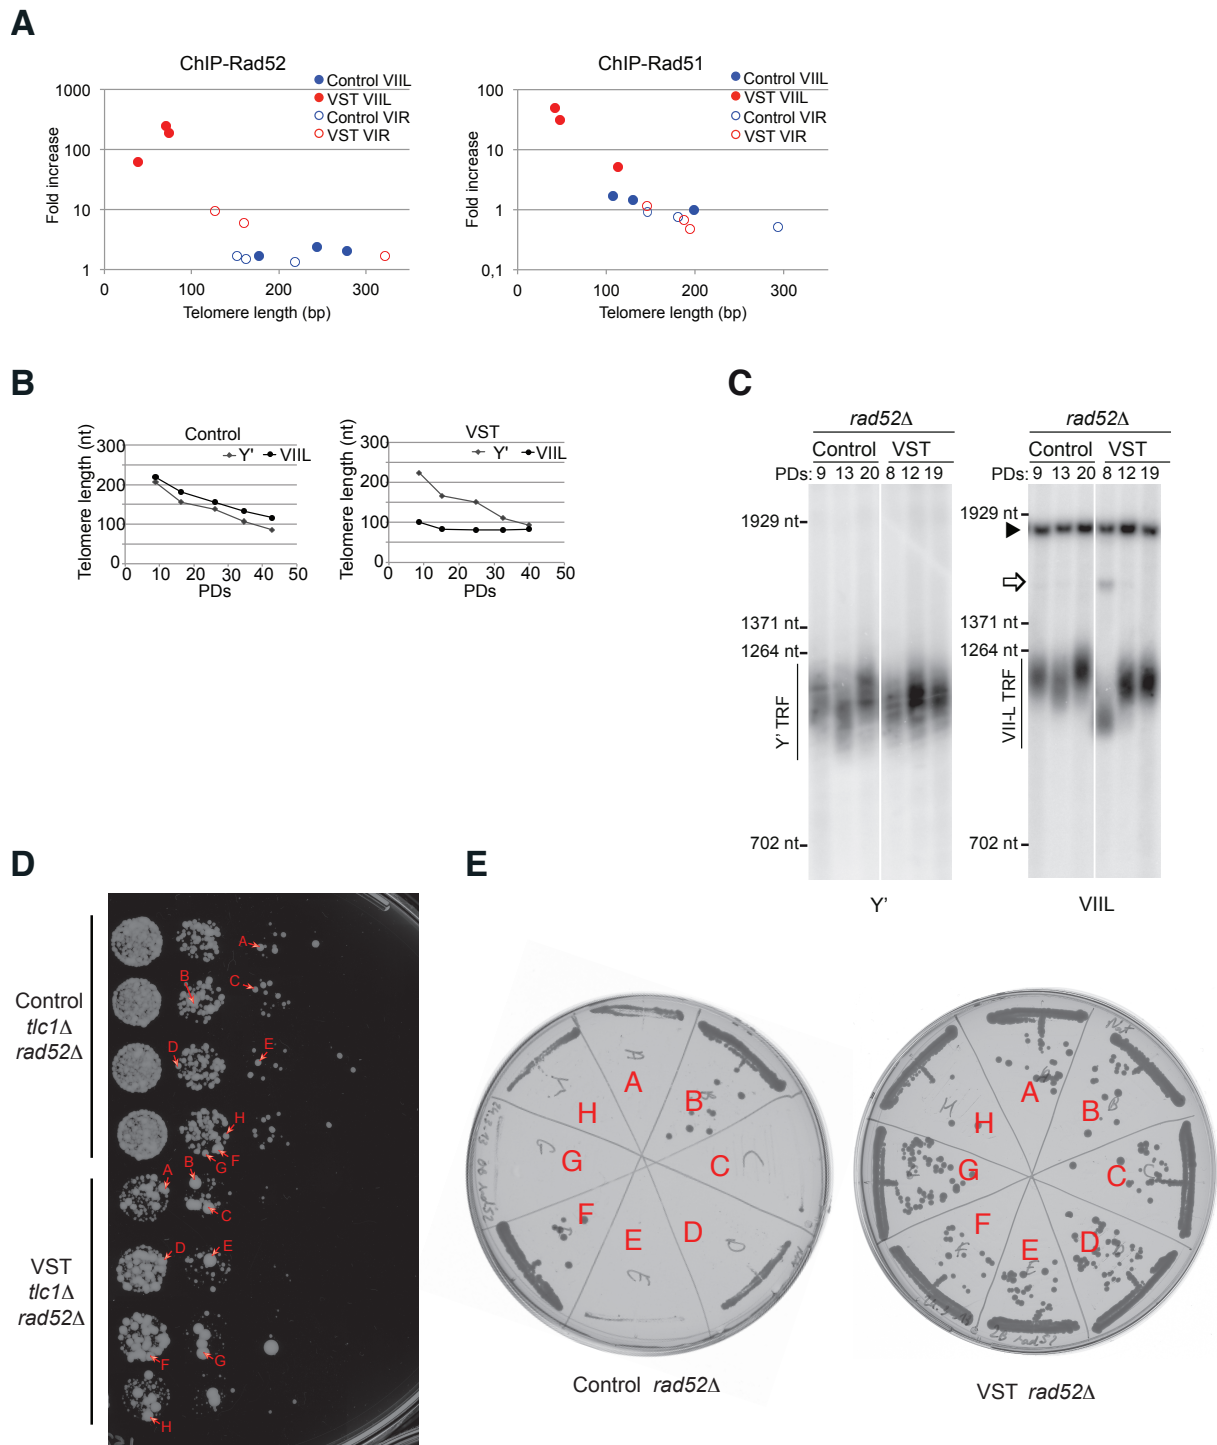

Supplementary Figure 4: Function of HR factors in senescence.

(A) Rad52 and Rad51 association with telomeres is length dependent. The fold increase in the association of Rad52 and Rad51 with telomeres compared to *ARO1* was plotted as a function of telomere length, as determined by telomere PCR, for VIIL (full circles) and VIR (open circles) in Control (blue) and VST (red) cells. Samples are the same as in Figure 3B. (B) The lengths of Y' (left

panel) and VIIL (right panel) telomeres in Control and VST cells were measured by Southern blot as shown in Figure 4B. **(C)** Southern blot as in Figure 4B in *tlc1Δ rad52Δ* Control and VST cells. **(D–E)** Selective pressure in cultures of *rad52Δ tlc1Δ* VST cells. **(D)** Cells from cultures at PD = 8–9 of Control and VST *rad52Δ tlc1Δ* were spotted on selective medium (4000 cells on the most concentrated spot and 10-fold dilutions) and grown for 2 days at 30°C. **(E)** Eight colonies, labelled A to H, were selected from the spots of Control and VST cells, streaked on plates, and grown again for 2 days at 30°C to check for the loss of viability expected after the loss of *TLC1*.

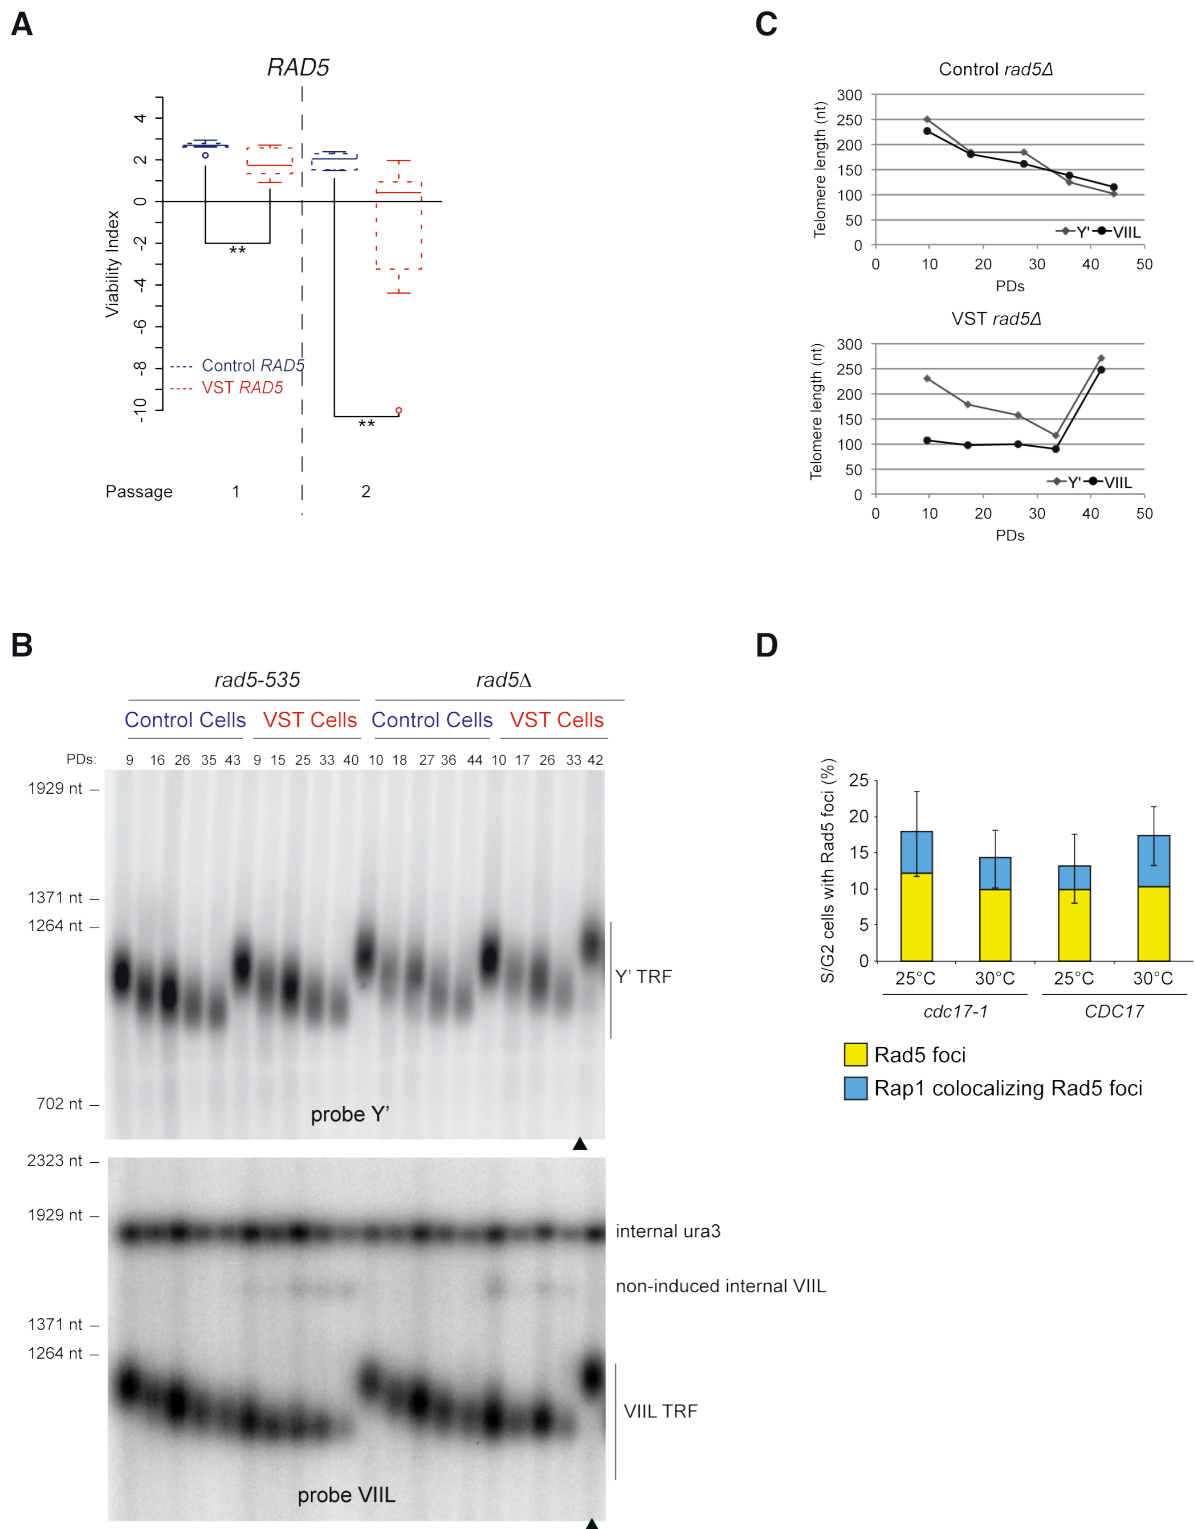

Supplementary Figure 5: Other Rad5 effects.

**(A)** A very short telomere accelerates senescence in wild-type *RAD5* cells. Quantitative analysis of senescence as in Figure 1C of 8 *RAD5 tlc1Δ* derivatives of yT357 and yT358. **(B)** Rad5-535 does not affect telomere length in the absence of telomerase. *rad5Δ tlc1Δ* Control and VST cells were selected by mass sporulation of yT299 (Control) and yT300 (VST) and plated on galactose medium containing

Nourseothricin but not histidine. Cells were resuspended and inoculated in glucose-rich medium containing Nourseothricin and diluted every day to  $10^5$  cells/mL. DNA was digested with *Xho* I (Y') or *Stu* I (VIII), electrophoresed, transferred to a membrane, and probed with a radioactive-labelled Y' or VIII probe. Terminal restriction fragments (TRFs) are indicated. The VIII probe also hybridized to the internal *ura3-1* locus as indicated. Arrow heads indicate samples containing post-senescent survivors. **(C)** Telomere length was measured from TRF mobility in electrophoresis and plotted against the number of PDs after the loss of *TLC1* for Y' (diamonds) and VIII (circles) telomeres. **(D)** Single-stranded G-tails are not the target for Rad5 recruitment to telomeres. Rad5-YFP foci were monitored in wild-type (ML690-16A) and *cdc17-1* mutant (ML690-6B) cells at permissive (25°C) and semi-permissive (30°C) temperatures, at which the *cdc17-1* mutation causes telomerase-dependent overextension of single-stranded G-tails (6).



*Supplementary Table 1: Yeast strains used in this study*

All strains are in the W303 background. All strains were constructed for this work, except those labelled with \*, which were described previously (2).

| Strain    | Genotype                                                                                                                                                                                                                                                                |
|-----------|-------------------------------------------------------------------------------------------------------------------------------------------------------------------------------------------------------------------------------------------------------------------------|
| yT136*    | Mata/α cir <sup>o</sup> ura3-1/ura3-1 trp1-1/trp1-1 his3-11,15/his3-11,15 can1-100/can1-100 ade2-1/ade2-1 leu2-3,112::Gal-FLP1-LEU2/leu2-3,112::Gal-FLP1-LEU2 rad5-535/rad5-535 tlc1::PrnNat/TLC1 telVIII::FRT-URA3-FRT-tel/telVIII::FRT-URA3-FRT-tel                   |
| yT138*    | Mata/α cir <sup>o</sup> ura3-1/ura3-1 trp1-1/trp1-1 his3-11,15/his3-11,15 can1-100/can1-100 ade2-1/ade2-1 leu2-3,112::Gal-FLP1-LEU2/leu2-3,112::Gal-FLP1-LEU2 rad5-535/rad5-535 tlc1::PrnNat/TLC1 telVIII::FRT-URA3-[tel600]-FRT-tel/telVIII::FRT-URA3-[tel600]-FRT-tel |
| yT143*    | yT136 rad52::kanMX4/RAD52                                                                                                                                                                                                                                               |
| yT145*    | yT138 rad52::kanMX4/RAD52                                                                                                                                                                                                                                               |
| yT174*    | yT136 tel1::HIS3/TEL1                                                                                                                                                                                                                                                   |
| yT176*    | yT138 tel1::HIS3/TEL1                                                                                                                                                                                                                                                   |
| yT225     | yT136 pol32::TRP1/POL32                                                                                                                                                                                                                                                 |
| yT226     | yT138 pol32::TRP1/POL32                                                                                                                                                                                                                                                 |
| yT231     | yT136 sae2::TRP1/SAE2                                                                                                                                                                                                                                                   |
| yT232     | yT138 sae2::TRP1/SAE2                                                                                                                                                                                                                                                   |
| yT235     | yT136 mre11::HIS3/MRE11                                                                                                                                                                                                                                                 |
| yT236     | yT138 mre11::HIS3/MRE11                                                                                                                                                                                                                                                 |
| yT257     | yT136 sgs1::TRP1/SGS1                                                                                                                                                                                                                                                   |
| yT258     | yT138 sgs1::TRP1/SGS1                                                                                                                                                                                                                                                   |
| yT299     | yT136 rad5::HIS3/rad5-535                                                                                                                                                                                                                                               |
| yT300     | yT138 rad5::HIS3/rad5-535                                                                                                                                                                                                                                               |
| yT303     | yT136 mms2::HIS3/MMS2                                                                                                                                                                                                                                                   |
| yT304     | yT138 mms2::HIS3/MMS2                                                                                                                                                                                                                                                   |
| yT347     | yT136 rad51::HIS3/RAD51                                                                                                                                                                                                                                                 |
| yT348     | yT138 rad51::HIS3/RAD51                                                                                                                                                                                                                                                 |
| yT355     | yT136 mus81::HIS3/MUS81                                                                                                                                                                                                                                                 |
| yT356     | yT138 mus81::HIS3/MUS81                                                                                                                                                                                                                                                 |
| yT357     | yT136 rad5::HIS3/RAD5                                                                                                                                                                                                                                                   |
| yT358     | yT138 rad5::HIS3/RAD5                                                                                                                                                                                                                                                   |
| yT403     | yT136 exo1::HIS3/EXO1                                                                                                                                                                                                                                                   |
| yT404     | yT138 exo1::HIS3/EXO1                                                                                                                                                                                                                                                   |
| yT567     | yT138 rad5::HIS3/rad5-535 rad52::kanMX4/RAD52                                                                                                                                                                                                                           |
| yT580     | Mata cir <sup>o</sup> rad5-535 ura3-1 trp1-1 his3-11,15 can1-100 ade2-1 leu2-3,112::Gal-FLP1-LEU2 telVIII::FRT-tel (lev187 (3) which has excised the URA3-containing circle)                                                                                            |
| yT581     | yT580 rad5-535-myc::HIS3MX6                                                                                                                                                                                                                                             |
| yT582     | yT580 RAD5-myc::HIS3MX6                                                                                                                                                                                                                                                 |
| yT583     | yT580 RAD5                                                                                                                                                                                                                                                              |
| ML690-16A | Mat a ADE2 trp1-1 RAD5-YFP RAP1-CFP::LEU2 RAD52-RFP                                                                                                                                                                                                                     |
| ML690-16B | ML690-16A <i>cdc17-1</i>                                                                                                                                                                                                                                                |
| ML691-12C | Mat a ADE2 trp1-1 RAD5-YFP RAP1-CFP::LEU2 RAD52-RFP est2::KanMX (pVL291: EST2)                                                                                                                                                                                          |

*Supplementary Table 2: p-values for the spot assays determined by pairwise Wilcoxon rank sum test with a false discovery rate adjustment*

| Experiment         | Genotype 1    | Genotype 2    | Passage | p- value |
|--------------------|---------------|---------------|---------|----------|
| MRE11<br>Figure 1C | Control MRE11 | VST MRE11     | 1       | 0.00093  |
|                    | Control MRE11 | VST MRE11     | 2       | 0.0539   |
|                    | Control MRE11 | Control mre11 | 1       | 0.15646  |
|                    | Control MRE11 | Control mre11 | 2       | 0.0036   |
|                    | VST MRE11     | VST mre11     | 1       | 0.18928  |
|                    | VST MRE11     | VST mre11     | 2       | 0.0287   |
|                    | Control mre11 | VST mre11     | 1       | 0.08778  |
|                    | Control mre11 | VST mre11     | 2       | 0.0033   |
|                    | Control MRE11 | VST mre11     | 1       | 0.00373  |
|                    | Control MRE11 | VST mre11     | 2       | 1.0000   |
|                    | Control mre11 | VST MRE11     | 1       | 0.00093  |
|                    | Control mre11 | VST MRE11     | 2       | 0.0033   |
| SAE2<br>Figure 1D  | Control SAE2  | VST SAE2      | 1       | 0,00027  |
|                    | Control SAE2  | VST SAE2      | 2       | 0,000035 |
|                    | Control SAE2  | VST SAE2      | 3       | 0,02288  |
|                    | Control SAE2  | Control sae2  | 1       | 0,00027  |
|                    | Control SAE2  | Control sae2  | 2       | 0,2388   |
|                    | Control SAE2  | Control sae2  | 3       | 0,00431  |
|                    | VST SAE2      | VST sae2      | 1       | 0,02642  |
|                    | VST SAE2      | VST sae2      | 2       | 0,0159   |
|                    | VST SAE2      | VST sae2      | 3       | 0,19298  |
|                    | Control sae2  | VST sae2      | 1       | 0,00064  |
|                    | Control sae2  | VST sae2      | 2       | 0,0014   |
|                    | Control sae2  | VST sae2      | 3       | 0,00103  |
|                    | Control SAE2  | VST sae2      | 1       | 0,000016 |
|                    | Control SAE2  | VST sae2      | 2       | 0,0109   |
|                    | Control SAE2  | VST sae2      | 3       | 0,16861  |
|                    | Control sae2  | VST SAE2      | 1       | 0,97787  |
|                    | Control sae2  | VST SAE2      | 2       | 0,000023 |
|                    | Control sae2  | VST SAE2      | 3       | 0,00053  |
| EXO1<br>Figure 1E  | Control EXO1  | VST EXO1      | 1       | 7.4e-06  |
|                    | Control EXO1  | VST EXO1      | 2       | 8.1e-06  |
|                    | Control EXO1  | VST EXO1      | 3       | 0.00022  |
|                    | Control EXO1  | Control exo1  | 1       | 0.80913  |
|                    | Control EXO1  | Control exo1  | 2       | 0.035    |
|                    | Control EXO1  | Control exo1  | 3       | 0.00083  |
|                    | VST EXO1      | VST exo1      | 1       | 0.28655  |
|                    | VST EXO1      | VST exo1      | 2       | 0.022    |
|                    | VST EXO1      | VST exo1      | 3       | 0.74296  |
|                    | Control exo1  | VST exo1      | 1       | 0.00013  |
|                    | Control exo1  | VST exo1      | 2       | 8.1e-06  |
|                    | Control exo1  | VST exo1      | 3       | 2.0e-05  |
|                    | Control EXO1  | VST exo1      | 1       | 7.4e-05  |
|                    | Control EXO1  | VST exo1      | 2       | 2.8e-05  |
|                    | Control EXO1  | VST exo1      | 3       | 0.00010  |
|                    | Control exo1  | VST EXO1      | 1       | 1.2e-05  |
|                    | Control exo1  | VST EXO1      | 2       | 8.1e-06  |
|                    | Control exo1  | VST EXO1      | 3       | 6.8e-05  |

|                                |                    |                  |              |           |
|--------------------------------|--------------------|------------------|--------------|-----------|
| RAD51<br>Figure 3A             | Control RAD51      | VST RAD51        | 1            | 0,027     |
|                                | Control RAD51      | VST RAD51        | 2            | 0,05889   |
|                                | Control RAD51      | Control rad51    | 1            | 0,000052  |
|                                | Control RAD51      | Control rad51    | 2            | 0,01433   |
|                                | VST RAD51          | VST rad51        | 1            | 0,011     |
|                                | VST RAD51          | VST rad51        | 2            | 0,00028   |
|                                | Control rad51      | VST rad51        | 1            | 0,014     |
|                                | Control rad51      | VST rad51        | 2            | 0,00273   |
|                                | Control RAD51      | VST rad51        | 1            | 0,0000044 |
|                                | Control RAD51      | VST rad51        | 2            | 0,00016   |
|                                | Control rad51      | VST RAD51        | 1            | 0,393     |
|                                | Control rad51      | VST RAD51        | 2            | 0,2093    |
|                                | POL32<br>Figure 3B | Control POL32    | VST POL32    | 1         |
| Control POL32                  |                    | VST POL32        | 2            | 0.00062   |
| Control POL32                  |                    | Control pol32    | 1            | 0.00591   |
| Control POL32                  |                    | Control pol32    | 2            | 0.00062   |
| VST POL32                      |                    | VST pol32        | 1            | 0.01329   |
| VST POL32                      |                    | VST pol32        | 2            | 0.38899   |
| Control pol32                  |                    | VST pol32        | 1            | 0.00093   |
| Control pol32                  |                    | VST pol32        | 2            | 0.67498   |
| Control POL32                  |                    | VST pol32        | 1            | 0.00093   |
| Control POL32                  |                    | VST pol32        | 2            | 0.00062   |
| Control pol32                  |                    | VST POL32        | 1            | 0.77887   |
| Control pol32                  |                    | VST POL32        | 2            | 0.77887   |
| rad5-535/<br>rad5<br>Figure 5A |                    | Control rad5-535 | VST rad5-535 | 1         |
|                                | Control rad5-535   | VST rad5-535     | 2            | 0.00047   |
|                                | Control rad5-535   | Control rad5     | 1            | 1.9e-05   |
|                                | Control rad5-535   | Control rad5     | 2            | 0.00227   |
|                                | VST rad5-535       | VST rad5         | 1            | 0.077     |
|                                | VST rad5-535       | VST rad5         | 2            | 0.07506   |
|                                | Control rad5       | VST rad5         | 1            | 2.8e-05   |
|                                | Control rad5       | VST rad5         | 2            | 0.00227   |
|                                | Control rad5-535   | VST rad5         | 1            | 6.0e-07   |
|                                | Control rad5-535   | VST rad5         | 2            | 5.7e-05   |
|                                | Control rad5       | VST rad5-535     | 1            | 0.021     |
|                                | Control rad5       | VST rad5-535     | 2            | 0.13167   |
|                                | MMS2<br>Figure 5B  | Control MMS2     | VST MMS2     | 1         |
| Control MMS2                   |                    | VST MMS2         | 2            | 6.8e-06   |
| Control MMS2                   |                    | Control mms2     | 1            | 0.44630   |
| Control MMS2                   |                    | Control mms2     | 2            | 0.6823    |
| VST MMS2                       |                    | VST mms2         | 1            | 0.00041   |
| VST MMS2                       |                    | VST mms2         | 2            | 0.0052    |
| Control mms2                   |                    | VST mms2         | 1            | 8.3e-08   |
| Control mms2                   |                    | VST mms2         | 2            | 1.4e-05   |
| Control MMS2                   |                    | VST mms2         | 1            | 8.3e-08   |
| Control MMS2                   |                    | VST mms2         | 2            | 1.4e-05   |
| Control mms2                   |                    | VST MMS2         | 1            | 1.0e-05   |
| Control mms2                   |                    | VST MMS2         | 2            | 6.8e-06   |

|                       |                   |                  |              |         |
|-----------------------|-------------------|------------------|--------------|---------|
| MUS81<br>Figure 7A    | Control MUS81     | VST MUS81        | 1            | 0.07795 |
|                       | Control MUS81     | VST MUS81        | 2            | 0.0422  |
|                       | Control MUS81     | Control mus81    | 1            | 0.72090 |
|                       | Control MUS81     | Control mus81    | 2            | 0.5054  |
|                       | VST MUS81         | VST mus81        | 1            | 0.07795 |
|                       | VST MUS81         | VST mus81        | 2            | 0.1086  |
|                       | Control mus81     | VST mus81        | 1            | 0.00093 |
|                       | Control mus81     | VST mus81        | 2            | 0.0027  |
|                       | Control MUS81     | VST mus81        | 1            | 0.00093 |
|                       | Control MUS81     | VST mus81        | 2            | 0.0027  |
|                       | Control mus81     | VST MUS81        | 1            | 0.07795 |
|                       | Control mus81     | VST MUS81        | 2            | 0.0295  |
|                       | SGS1<br>Figure 7B | Control SGS1     | VST SGS1     | 1       |
| Control SGS1          |                   | VST SGS1         | 2            | 4.6e-06 |
| Control SGS1          |                   | Control sgs1     | 1            | 4.5e-05 |
| Control SGS1          |                   | Control sgs1     | 2            | 0.51    |
| VST SGS1              |                   | VST sgs1         | 1            | 0.71    |
| VST SGS1              |                   | VST sgs1         | 2            | 0.94    |
| Control sgs1          |                   | VST sgs1         | 1            | 4.0e-08 |
| Control sgs1          |                   | VST sgs1         | 2            | 4.6e-06 |
| Control SGS1          |                   | VST sgs1         | 1            | 4.0e-08 |
| Control SGS1          |                   | VST sgs1         | 2            | 4.6e-06 |
| Control sgs1          |                   | VST SGS1         | 1            | 3.3e-05 |
| Control sgs1          |                   | VST SGS1         | 2            | 4.6e-06 |
| rad5-535<br>Figure S1 |                   | Control rad5-535 | VST rad5-535 | 1       |
|                       | Control rad5-535  | VST rad5-535     | 2            | 0.0047  |
|                       | Control rad5-535  | VST rad5-535     | 3            | 0.0015  |
| RAD5<br>Figure S3A    | Control RAD5      | VST RAD5         | 1            | 0,013   |
|                       | Control RAD5      | VST RAD5         | 2            | 0,0027  |

Supplementary Table 3: Oligonucleotides used in this study

| Name         | Use          | Sequence 5'-3'                                                                      |
|--------------|--------------|-------------------------------------------------------------------------------------|
| OMK_pol32_F1 | POL32 F1     | ACAACCAGAAATAGGCTTTAGTTAACTCAATCGGTAATTACAGCTGAAGCTTCGTACG<br>C                     |
| OMK_pol32_R1 | POL32 R1     | GATCTATTTTTCTATCACGTAAGTTGACATTTGTATTATAGGCCGATTCATTAATGCAG<br>G                    |
| oT193        | MRE11 F1     | TTAAGAGAATGCAGACAATTGACGCAAGTTGTACCTGCTCAGATCCGATAAACTCG<br>ACTcggatccccgggtaattaa  |
| oT194        | MRE11 R1     | TCGCGAAGGCAAGCCCTTGTTATAAATAGGATATAATATAATATAGGGATCAAGTAC<br>AAgaattcgagctcgtttaaac |
| oT197        | SAE2 F1      | TATCGTTCACATACCTGCATTTCCATCCATGCTGTAAGCCATTAGGTGTTTGTATGTG<br>AGcggatccccgggtaattaa |
| oT198        | SAE2 R1      | TTCAACCATACCAAAAAAATGATTTGAAGTAATGAATAAAGAATGATGATCGCTGG<br>CGgaattcgagctcgtttaaac  |
| oT220        | SGS1 F1      | ATTATTGTTGTATATATTTAAAAATCATACACGTACACACAAGGCGGTAcggatccccggg<br>ttaattaa           |
| oT221        | SGS1 R1      | GCGAATGGTGTCTAGTTATAAGTAACACTATTTATTTTTCTACTCTTCgaattcgagctcg<br>ttaaac             |
| oT230        | RAD5 F1      | TACAAAGTTACATTATCAAAAGGCCTTAGAAACACACCTAAAGTCTTACAGTATCACA<br>ATcggatccccgggtaattaa |
| oT231        | RAD5 R1      | AGTTCCTTTCGGGTTGAAAATAATAATAAAAGTCTTTATATATGAGTATGTGGTATG<br>Agaattcgagctcgtttaaac  |
| oT354        | RAD5 F2      | GACACAGACGAAGACGAGAGAAGAAAAAGGAGAATTGAAGAAATCCAGATGCTGTTT<br>GAAcggatccccgggtaattaa |
| oT234        | MMS2 F1      | GTCGTGGTGAATTTCTTATTCTGTATATGCAACGTAGAAGAAAGCAGCGTTTACACAA<br>AAcggatccccgggtaattaa |
| oT235        | MMS2 R1      | TTGCTTGATATATGAGTGGCTTGAATGCTGCAAATACTGTTTAGGAAAAAGTAGAT<br>AAgaattcgagctcgtttaaac  |
| oT319        | MUS81 F1     | AAACAAAGTTTCAAAGGATTGATACGAACACACATTCCCTAGCATGAAAGCcgatccccgg<br>gtaattaa           |
| oT320        | MUS81 R1     | ATCACTTTTTCTTTATAAACCTTGCAGGGATGACTATATTTCAAATTGgaattcgagctcgt<br>ttaaac            |
| oT586        | EXO1 F1      | CAGGTATATCTATATGCTCTCATAGAATTATATTTGATATTGCTTTTTGcggatccccggg<br>taattaa            |
| oT587        | EXO1 R1      | TTTACTGGGCATTGATTTTTTAATTCTTGTCTTGAGGCATTTGACGAGAGaattcgagctc<br>gtttaaac           |
| oT323        | RAD51 F1     | TTCTTCTATCTTCCGTAGTTCCATATACTAGTAGTTGAGTGTAGCGACcggatccccgg<br>gtaattaa             |
| oT324        | RAD51 R1     | GGATGGAAATGAAGATAAAAATGTACGGAACGCAACCTAAGAAAAAGAGGgaattcgagc<br>tcgtttaaac          |
| oT316        | Y' probe     | GAGTTTTTCAGCGTTTTCGTTCCA                                                            |
| oT318        | Y' probe     | TTACTCGCGCTGTCACACCTTACC                                                            |
| 169          | teloPCR      | CGGGATCCGGGGGGGGGGGGGGGGGGGG                                                        |
| oT182        | teloPCR Y'   | TACATGAGGGCTATTTAGGGCTATTTAGGG                                                      |
| oT156        | teloPCR VIIL | TTGTTGAAAGCCATACCTGCC                                                               |
| oT531        | teloPCR VIR  | AGGACTGGGTCATGGGGCGC                                                                |
| oT310        | qPCR VIIL F  | TGATATGTGTTACGCAGAATAC                                                              |
| oT311        | qPCR VIIL R  | TGAGAAGCACCGCAATG                                                                   |
| oT312        | qPCR VIR F   | ATCATTGAGGATCTATAATC                                                                |
| oT313        | qPCR VIR R   | CTTCACTCCATTGCG                                                                     |

|       |                   |                                     |
|-------|-------------------|-------------------------------------|
| oT314 | qPCR ARO1 F       | TCGTTACAAGGTGATG                    |
| oT315 | qPCR ARO1 R       | AATAGCGGCAACAAC                     |
| oT570 | qPCR Y' F         | GGCTTGGAGGAGACGTACATG               |
| oT571 | qPCR Y' R         | CTCGCTGTCACCTCCTTACCCG              |
| oT588 | VIII QAOS forward | CACCGCAATGCAAGGCAATTTAC             |
| oT589 | VIII QAOS reverse | AACCAGCGCAGCGGCATGTGT               |
| oT590 | VIII QAOS tagging | AACCAGCGCAGCGGCATGTGTGTTACGCAGAATAC |
| oT591 | VIR QAOS forward  | TGAGGATTATAGGTAATGGCAAGGGTAA        |
| oT592 | VIR QAOS reverse  | TGCCCTCGCATCGCTCTCCTT               |
| oT593 | VIR QAOS tagging  | TGCCCTCGCATCGCTCTCCTTCACTCCATTG     |

### *Supplementary references*

111. Decourty, L., Saveanu, C., Zemam, K., Hantraye, F., Frachon, E., Rousselle, J.-C., Fromont-Racine, M. and Jacquier, A. (2008) Linking functionally related genes by sensitive and quantitative characterization of genetic interaction profiles. *PNAS*, **105**, 5821-5826.
112. Adams Martin, A., Dionne, I., Wellinger, R.J. and Holm, C. (2000) The function of DNA polymerase alpha at telomeric G tails is important for telomere homeostasis. *Mol. Cell. Biol.*, **20**, 786-796.
